# Supplementary material for: Development of a prognostic model for hepatocellular carcinoma using genes involved in aerobic respiration
Source: publisher site journal article supplement (doi:10.18632/aging.203021), 2021-04-26
Supplement: Supplementary file [file aging-v13i9-203021-supplementary-material-SD1.pdf]

## SUPPLEMENTARY FIGURES

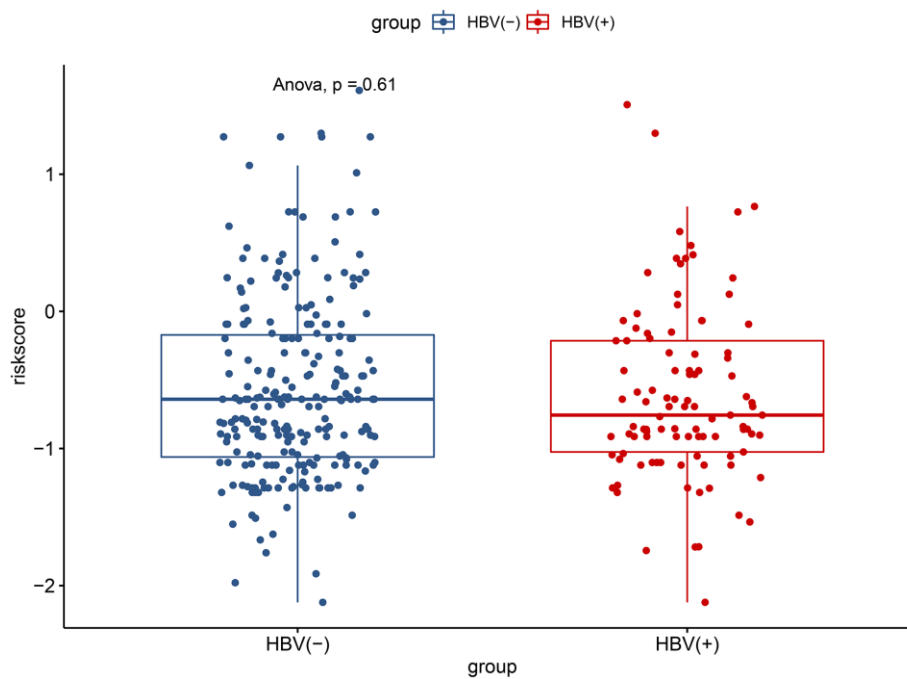

Supplementary Figure 1. No significant differences of risk score were found between HBV-related HCC and non-HBV HCC.

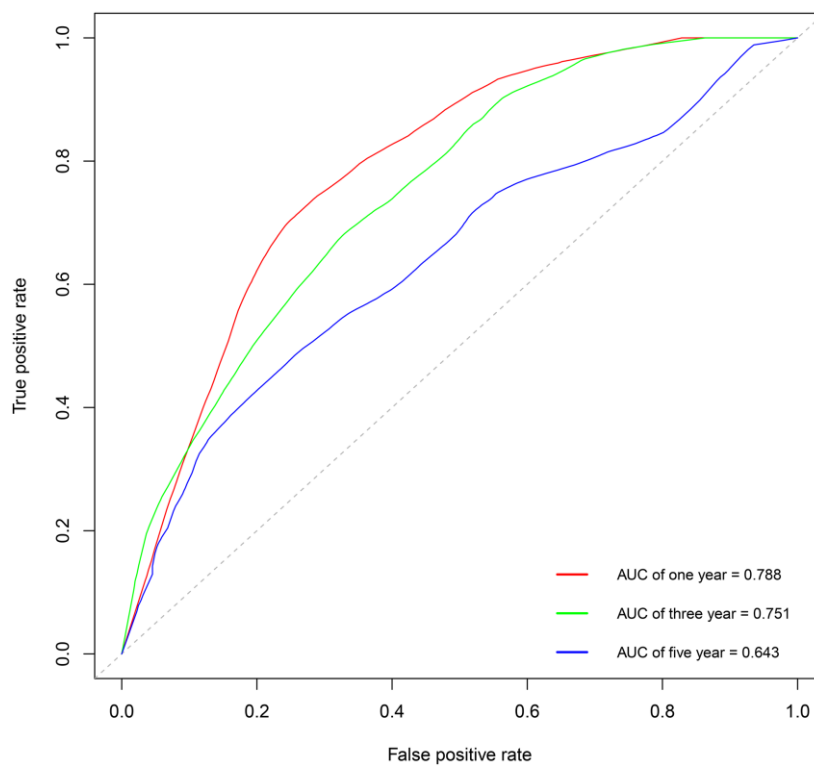

Supplementary Figure 2. Survival-dependent receiver operating characteristic (ROC) curves showed the prognostic value of the prognostic model based on genes of aerobic respiration and glycolysis.

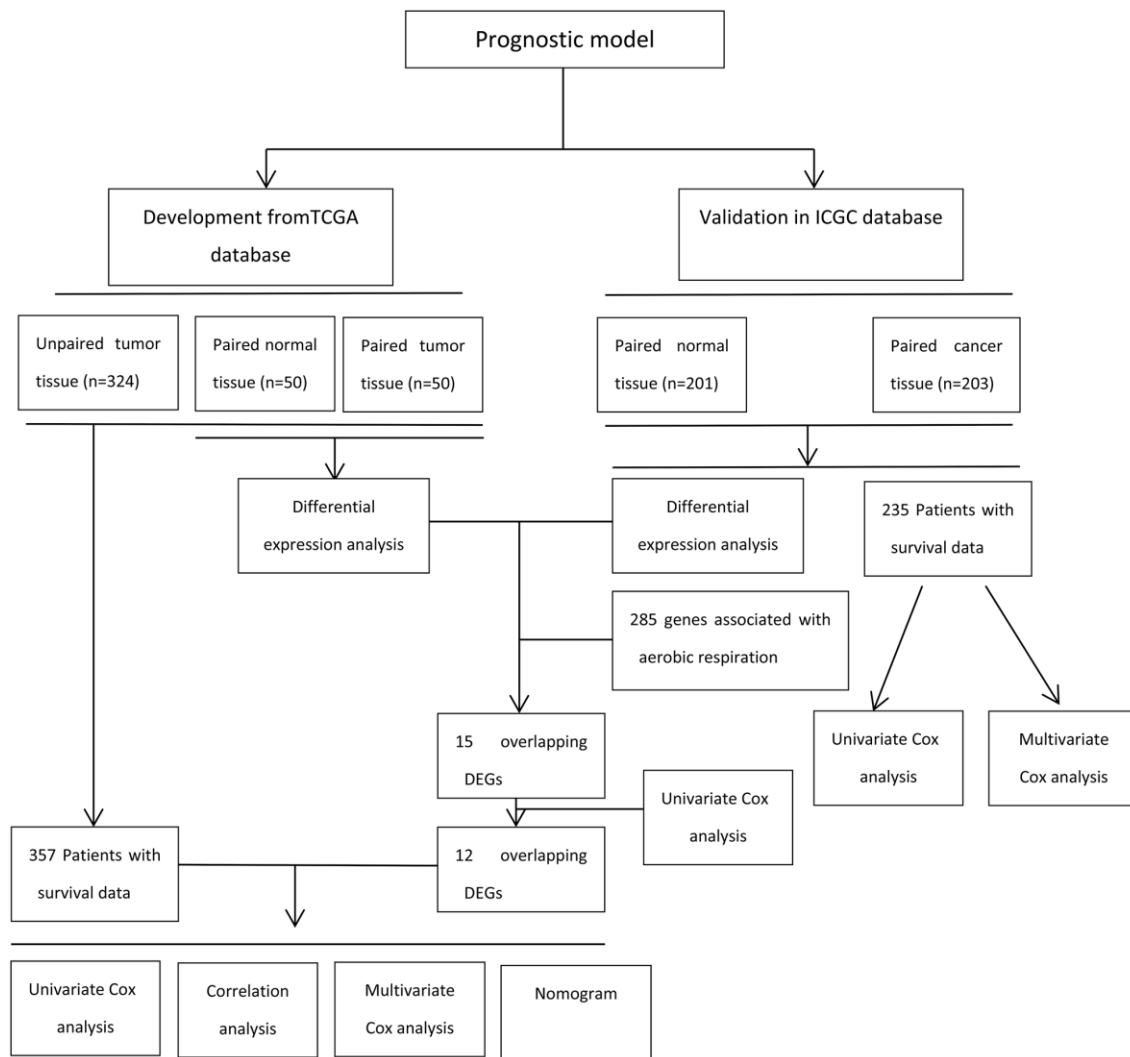

**Supplementary Figure 3. Flow chart of establishing a prognostic model based on 12 genes for HCC.**
